# Supplementary material for: KRAS-Driven Lung Adenocarcinoma and B Cell Infiltration: Novel Insights for Immunotherapy
Source: PubMed Central journal article supplement (PMC6721568; doi:10.3390/cancers11081145), 2019-08-09

C10ORF54 Expression Level (log2 RSEM)

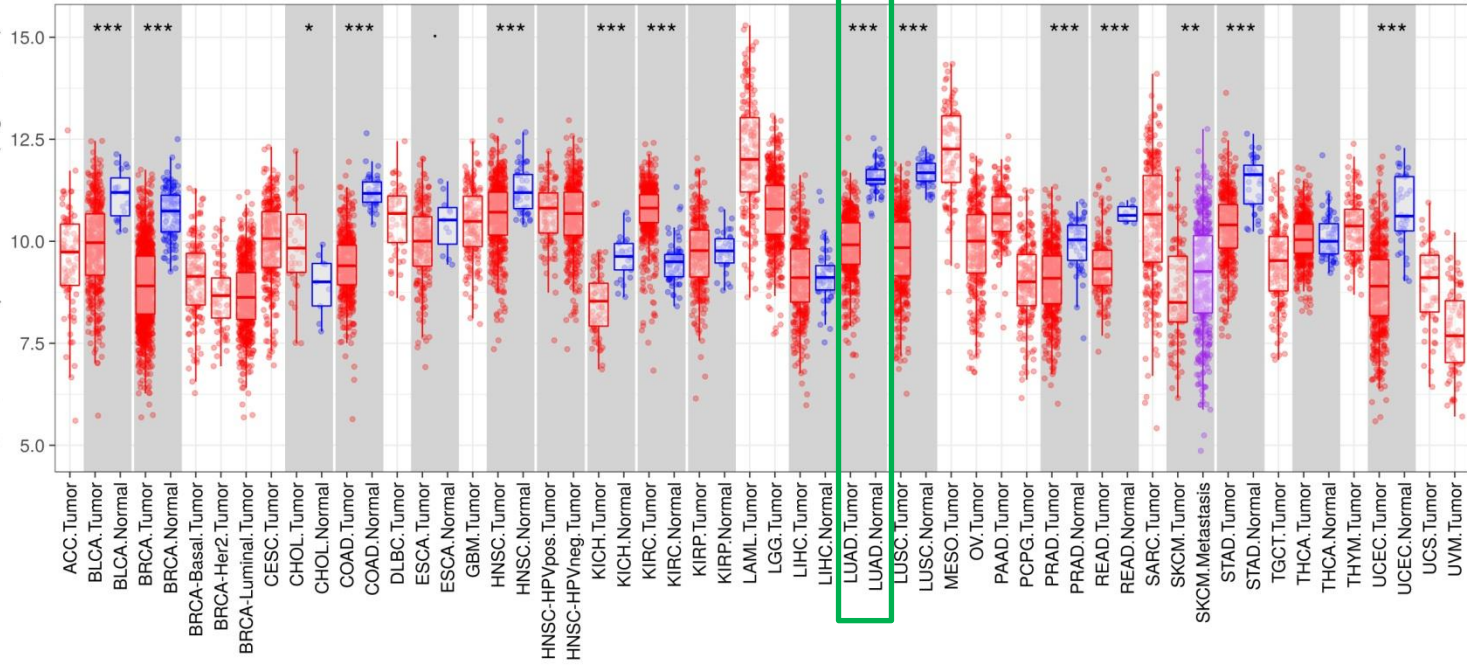

TGFBFR3 Expression Level (log2 RSEM)

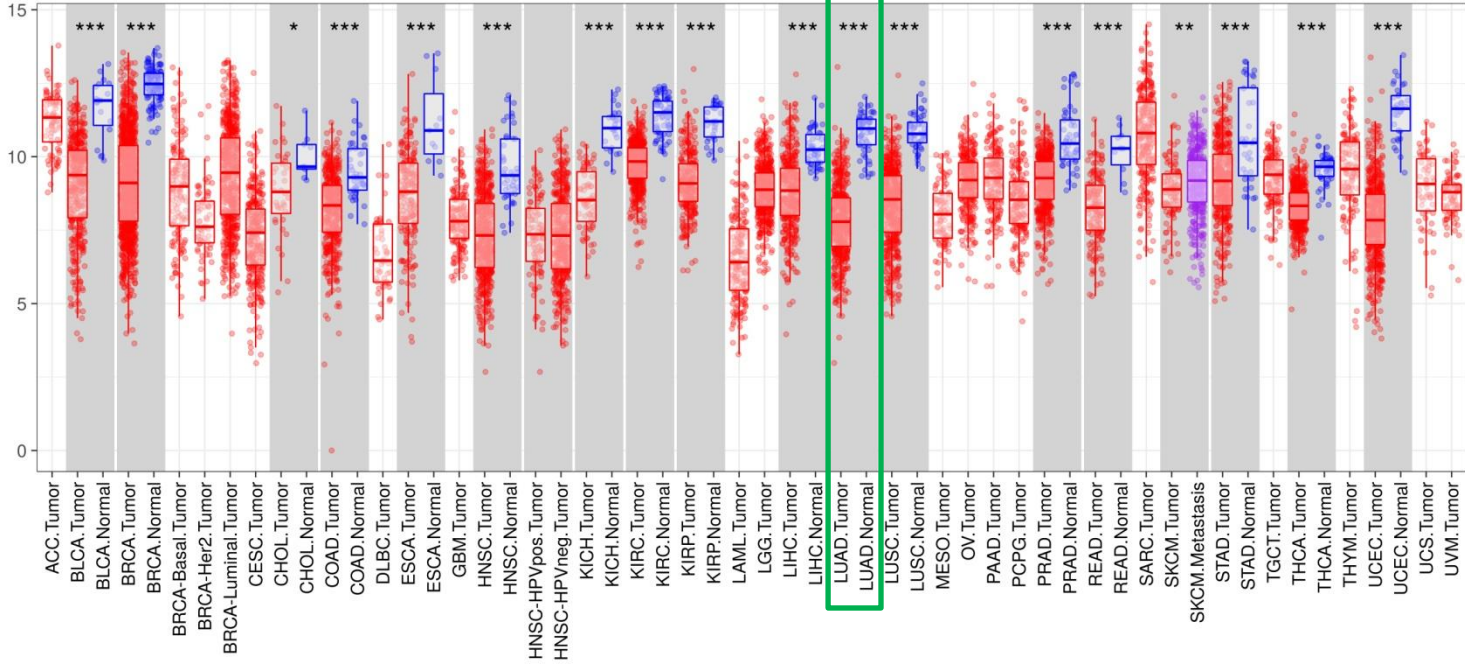

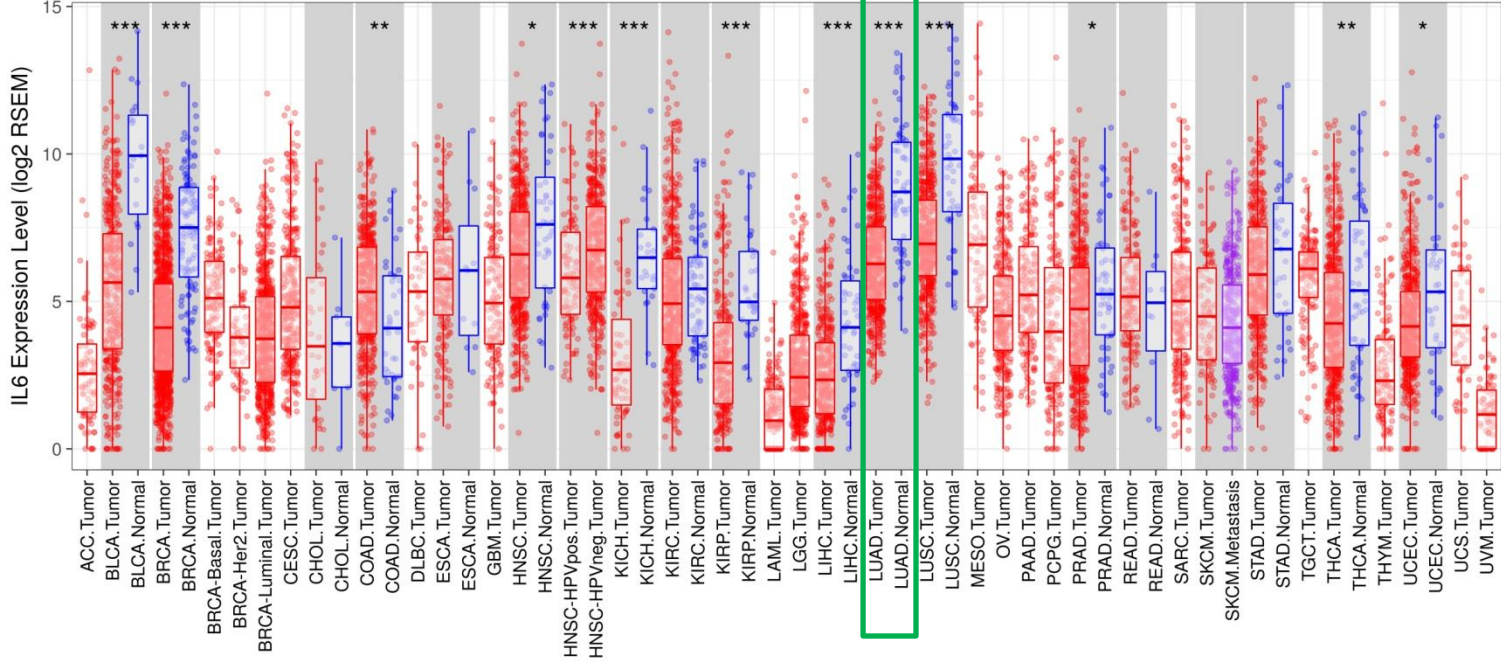

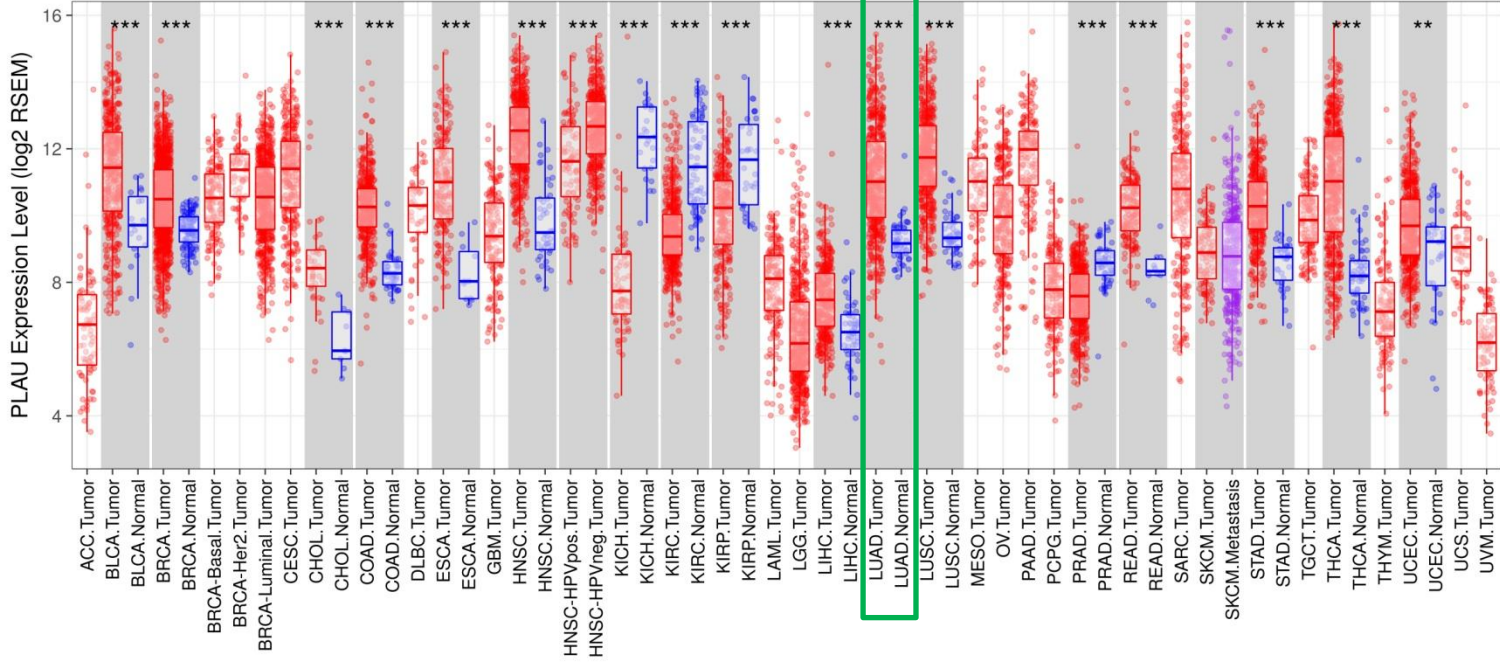



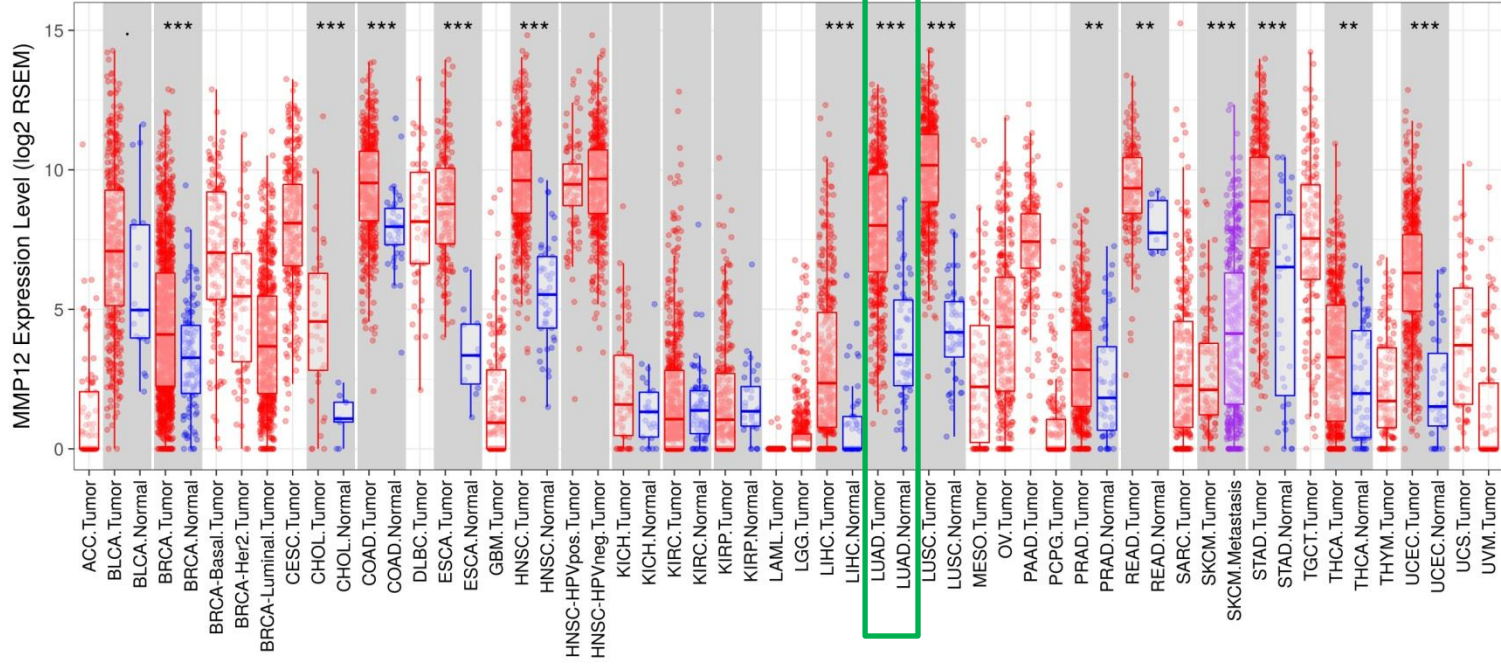

TNFRSF9 Expression Level (log2 RSEM)

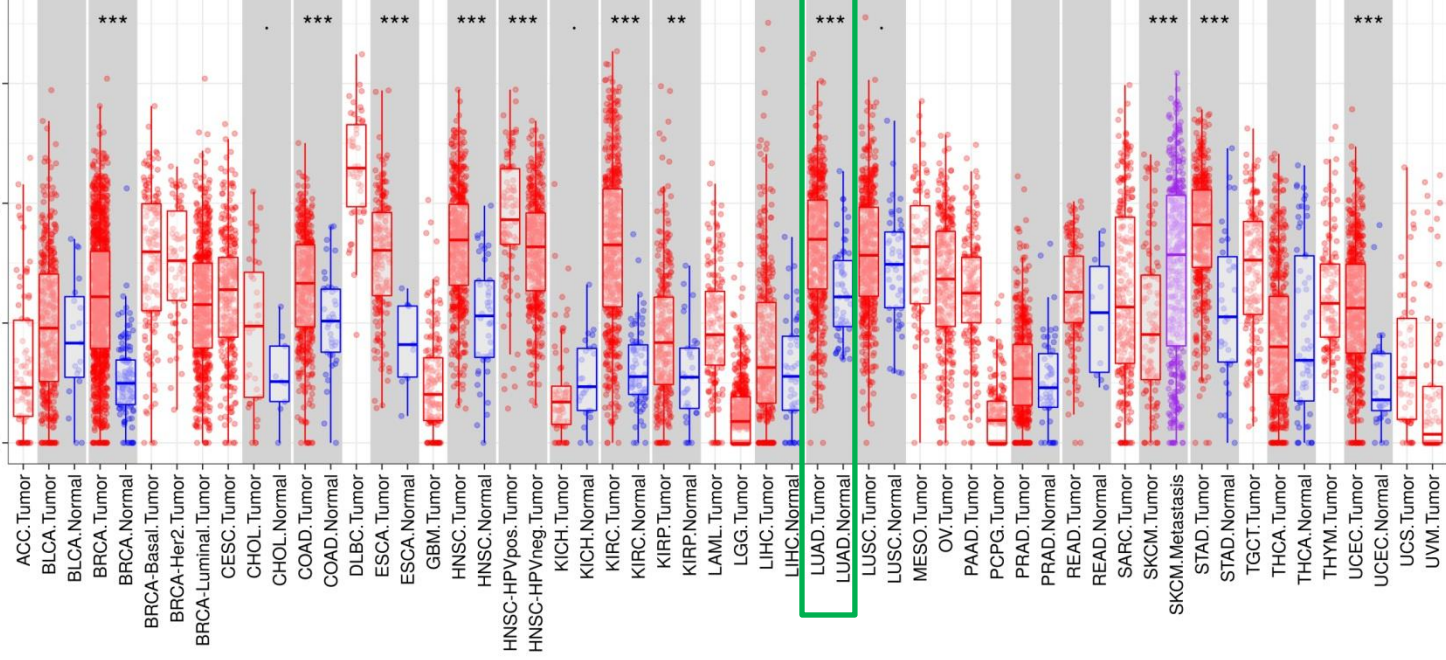

ADORA2A Expression Level (log2 RSEM)

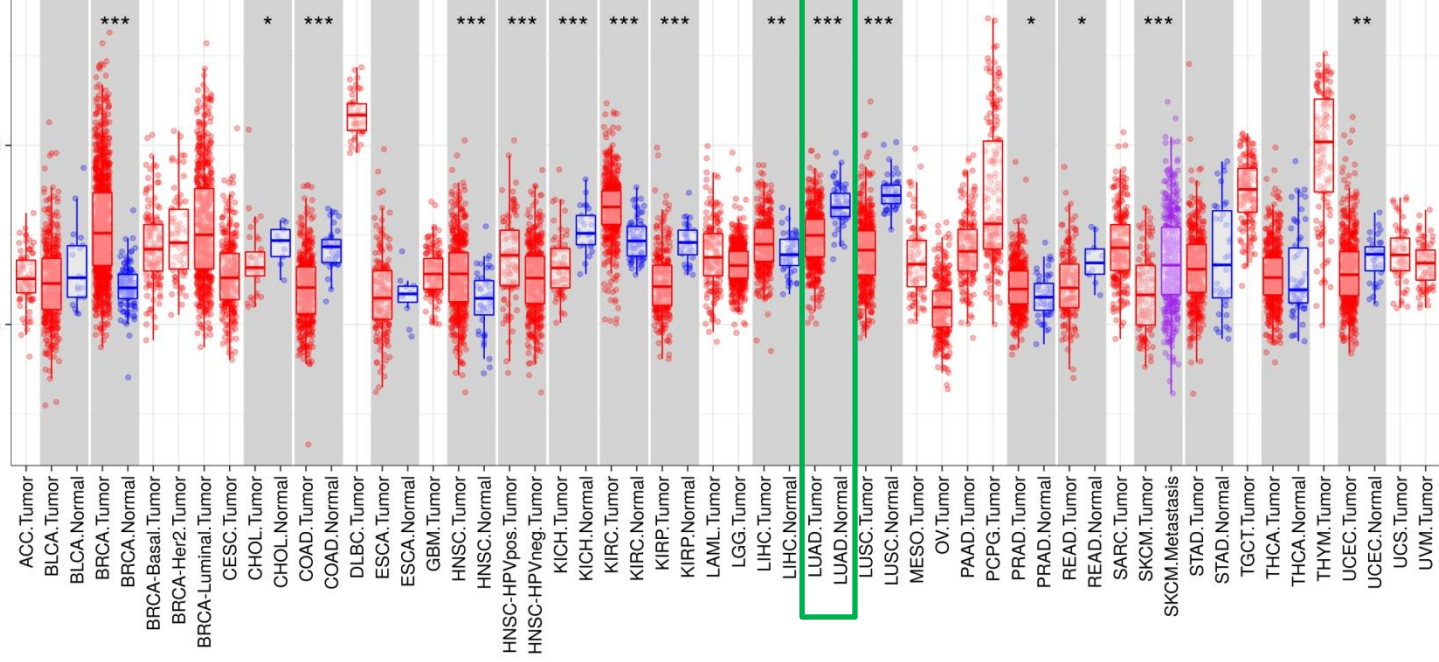

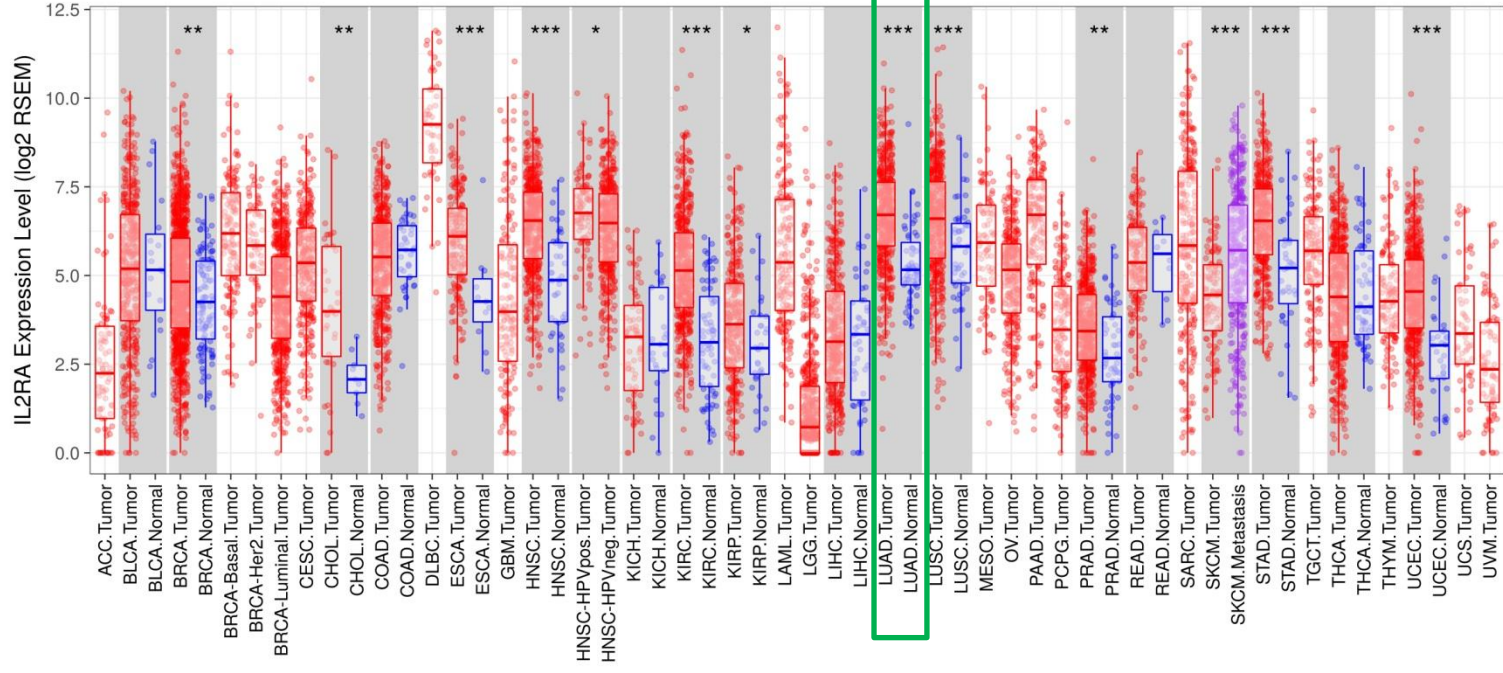



FOXP3 Expression Level (log2 RSEM)

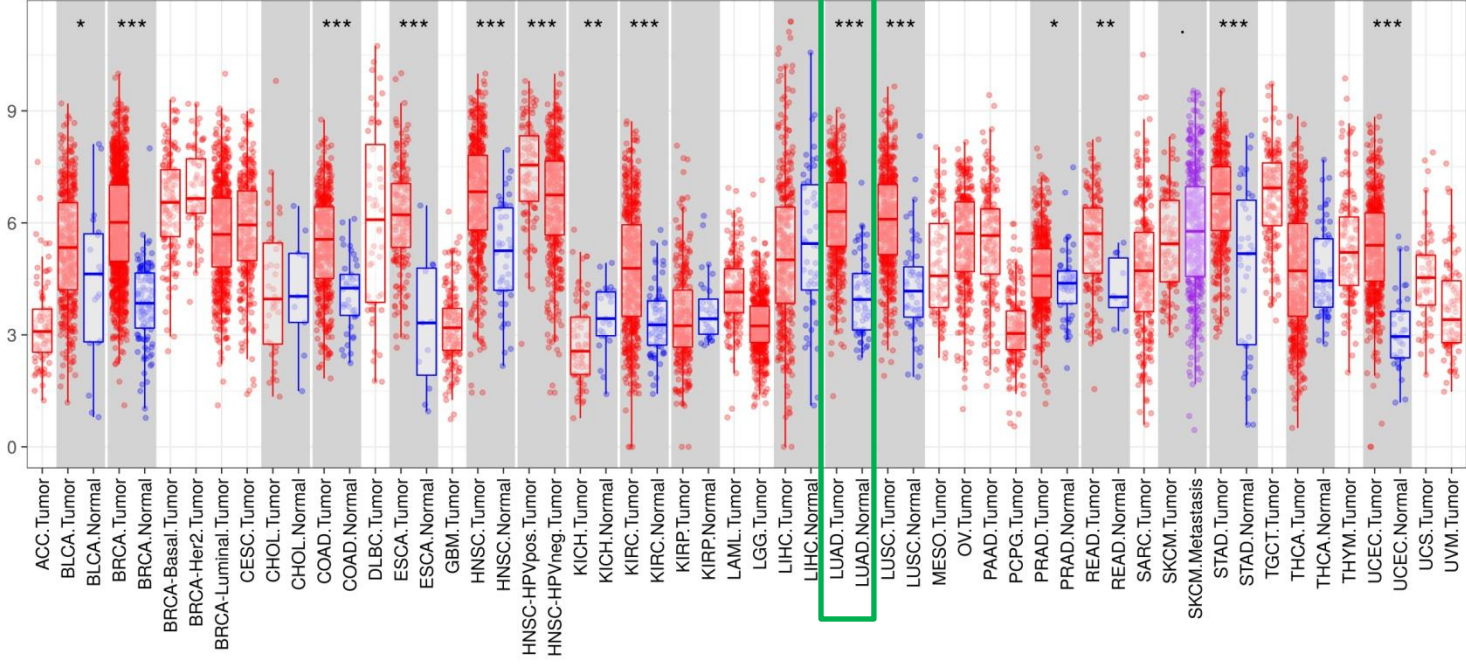

NT5E Expression Level (log2 RSEM)

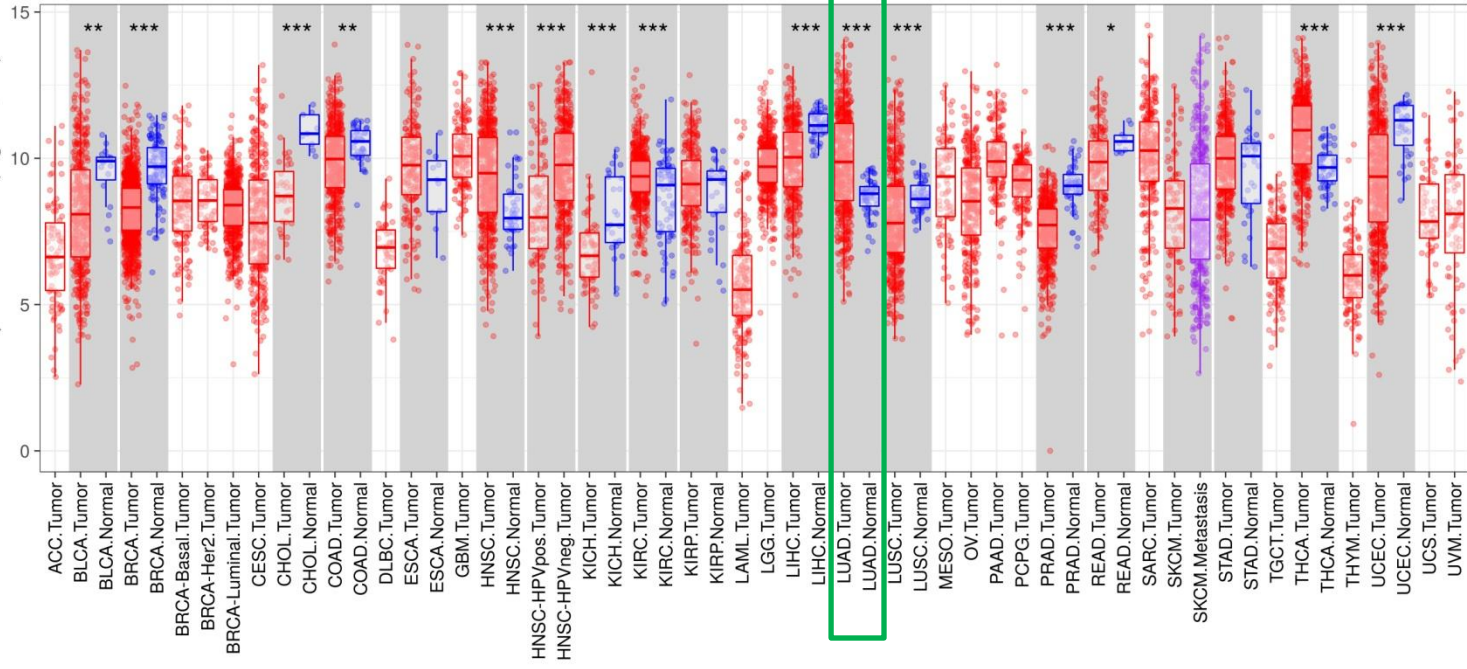

MUC1 Expression Level (log2 RSEM)

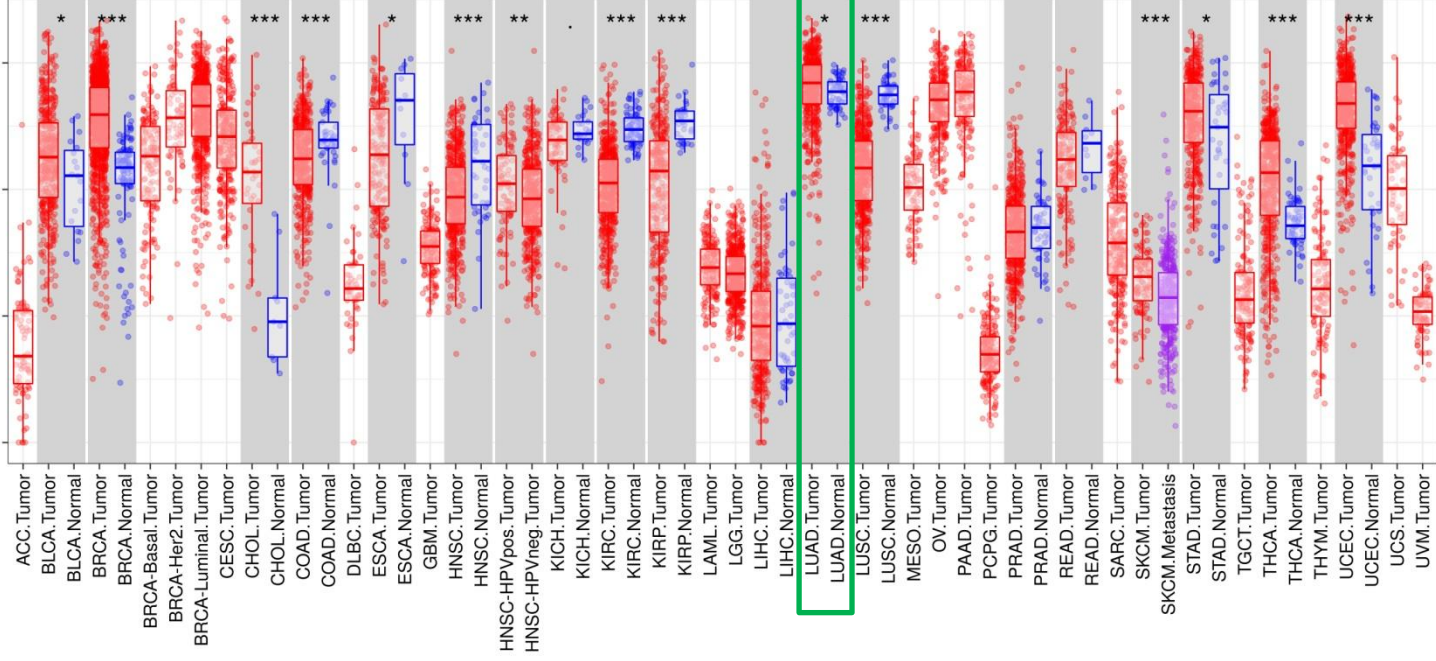

TNFRSF18 Expression Level (log2 RSEM)

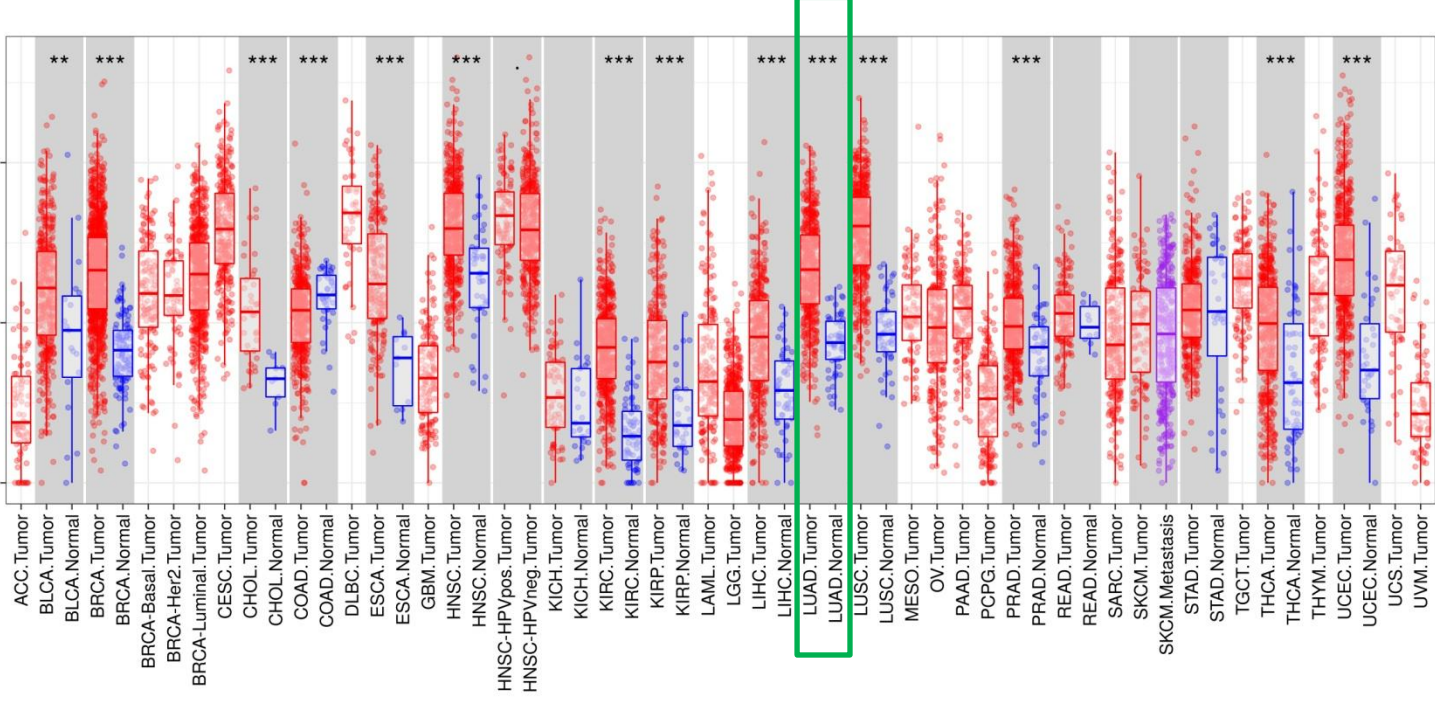



TNFSF18 Expression Level (log2 RSEM)

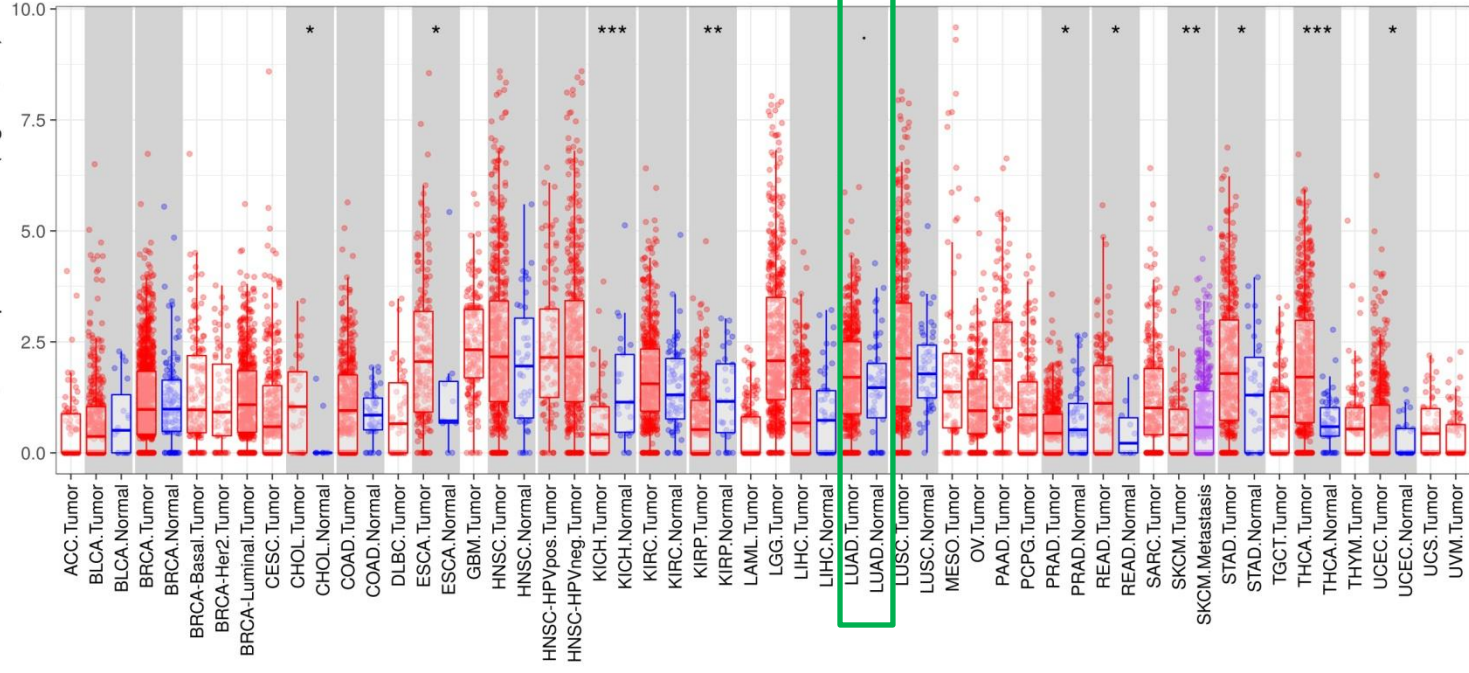

MMP9 Expression Level (log2 RSEM)

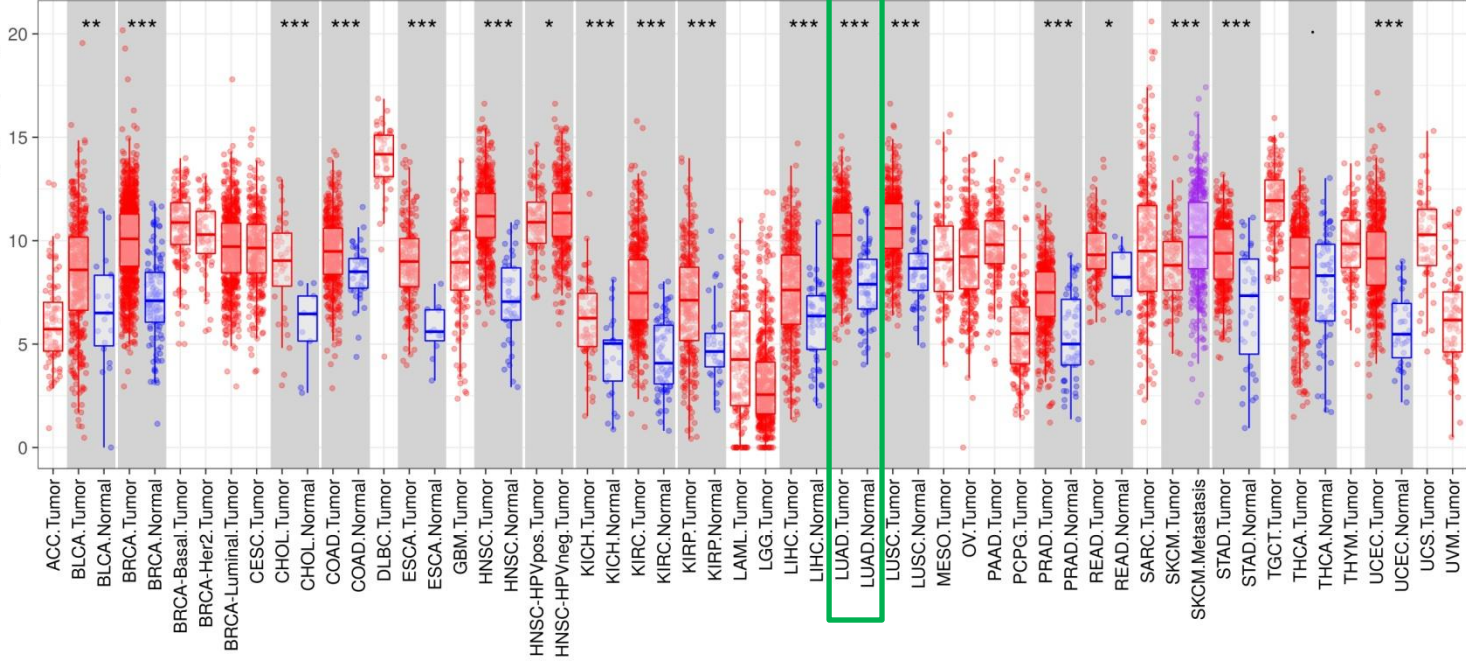

HPSE Expression Level (log2 RSEM)

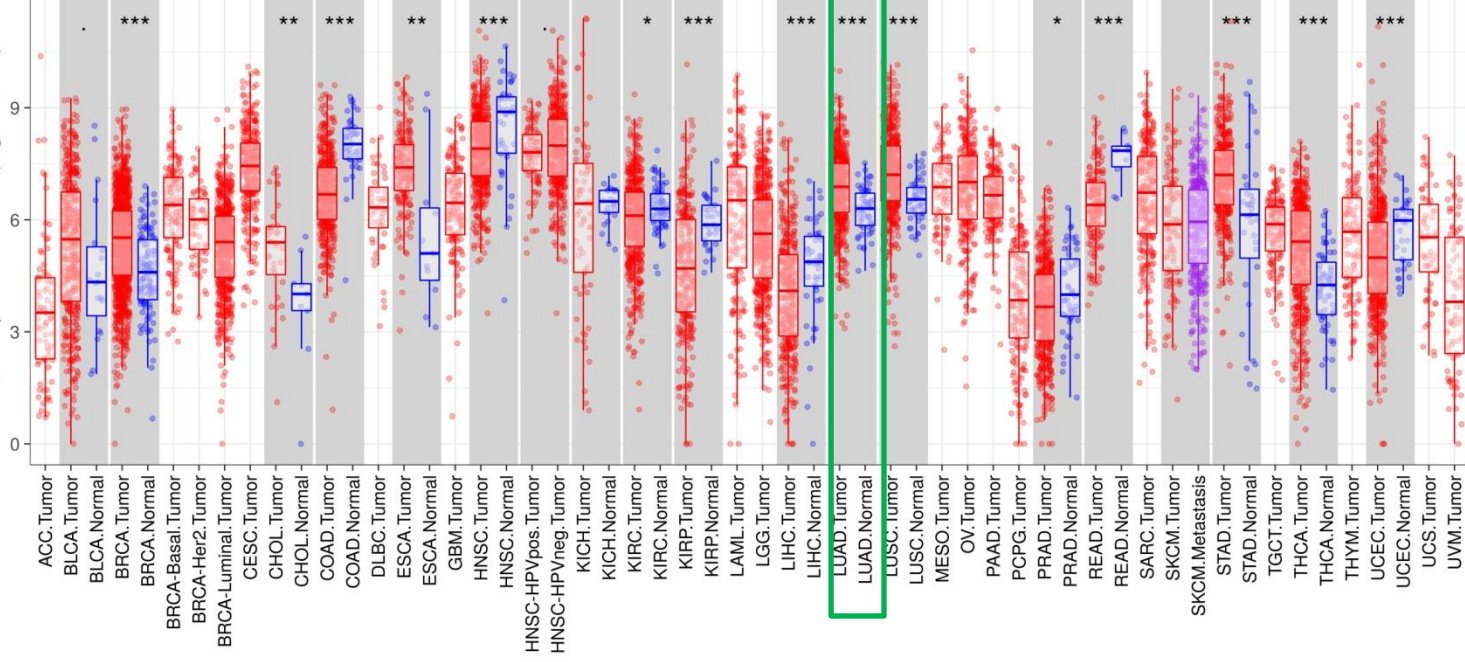

IL12B Expression Level (log2 RSEM)

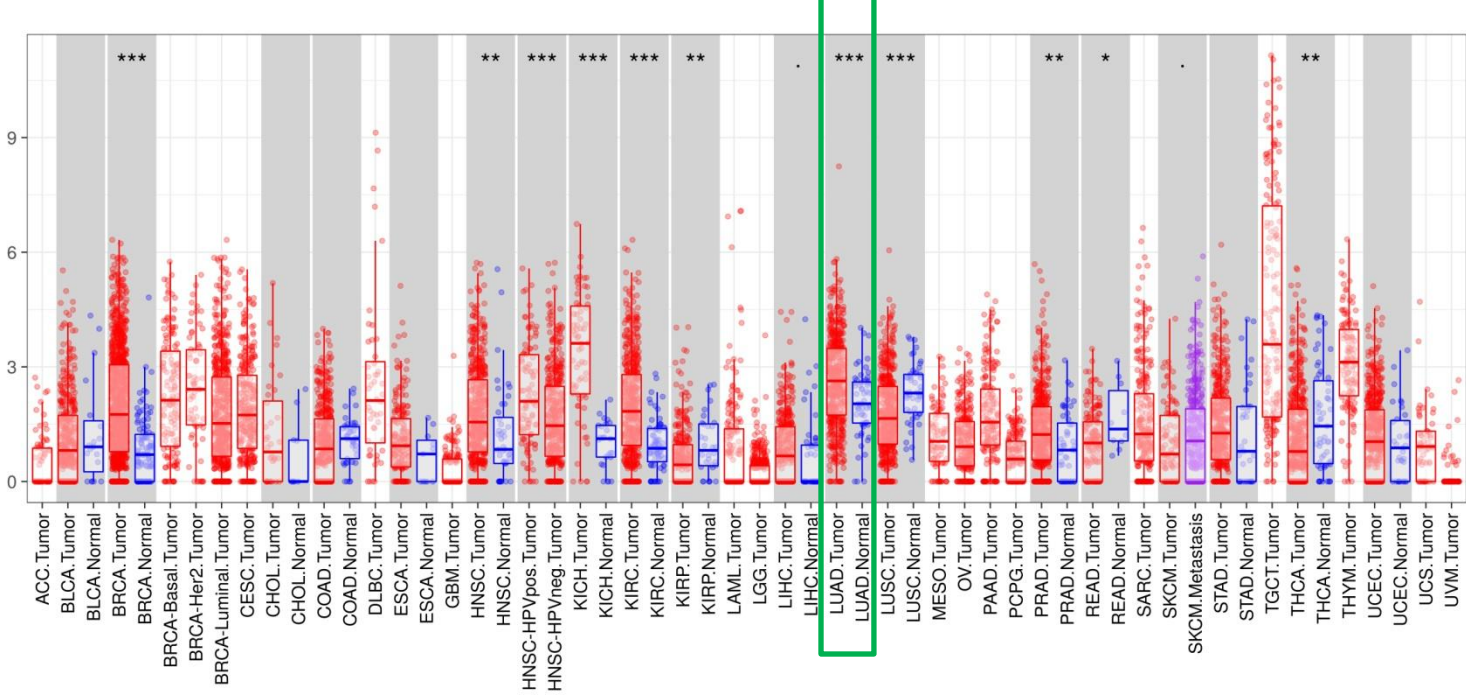



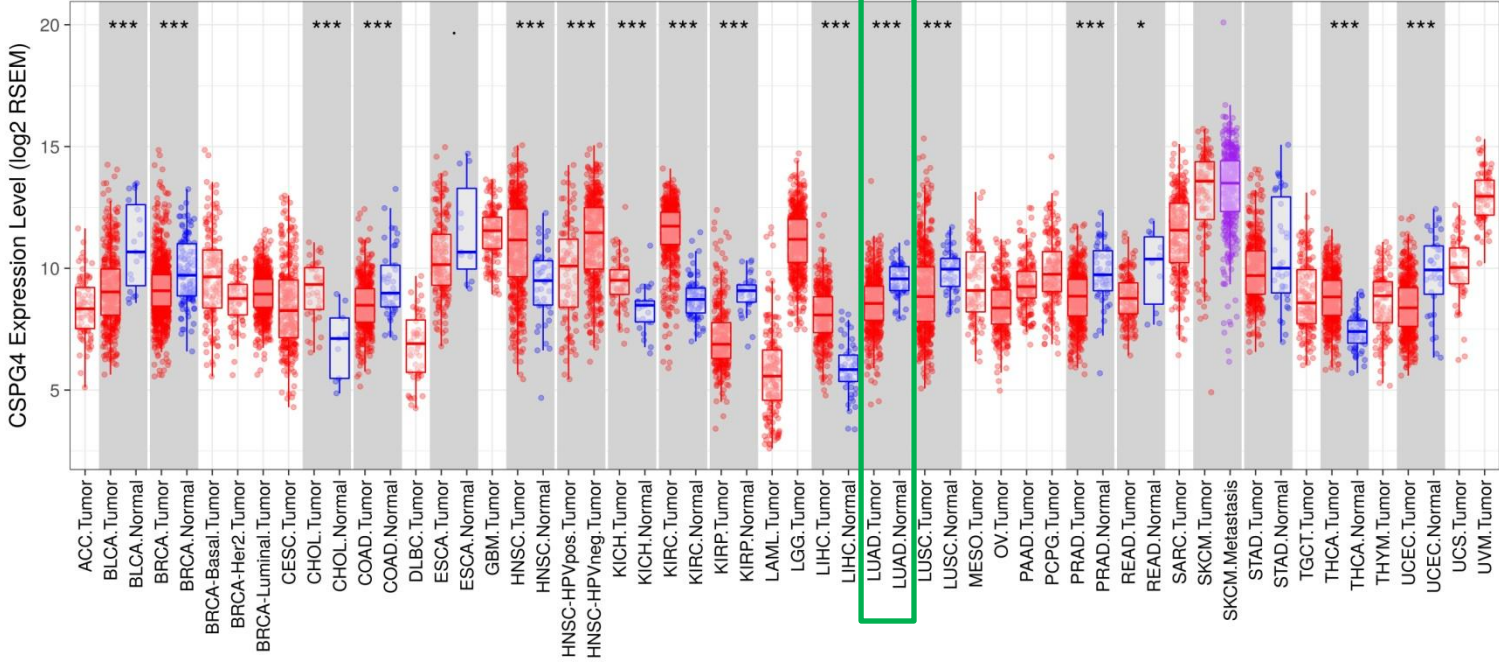

CEACAM1 Expression Level (log2 RSEM)

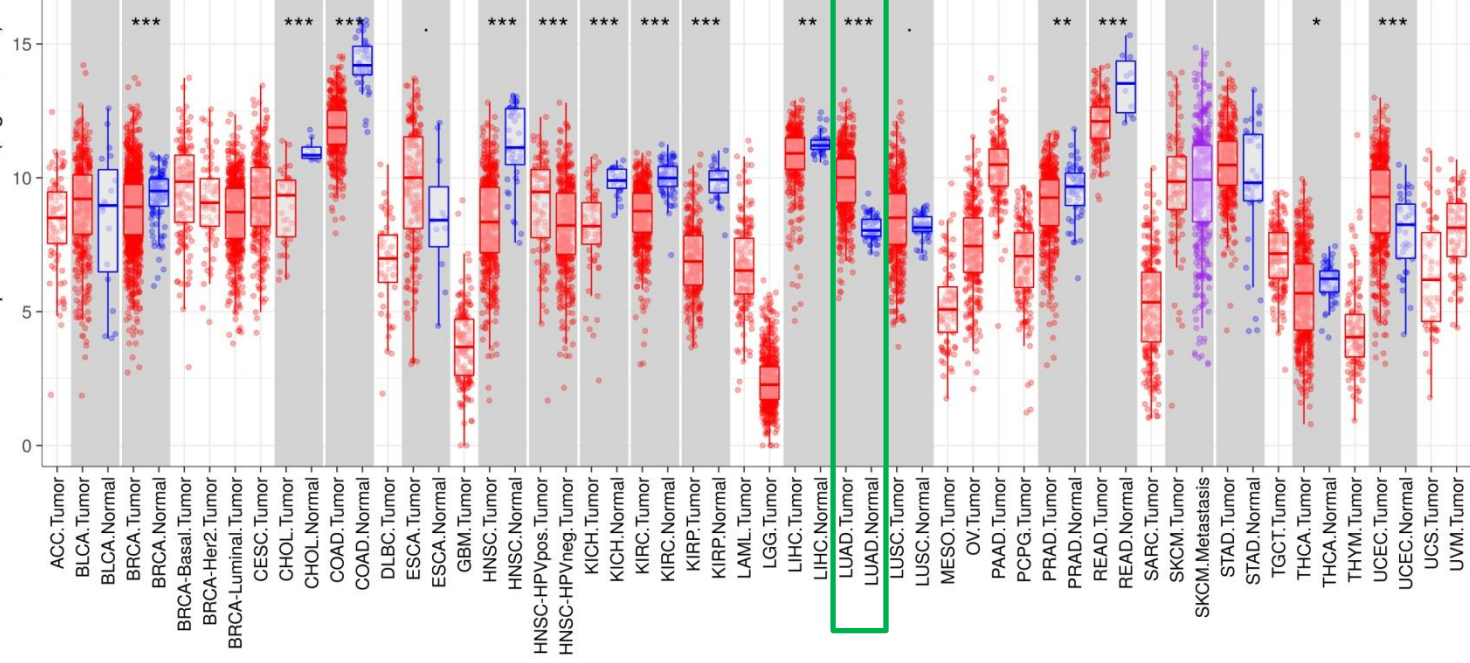

TGFBFR2 Expression Level (log2 RSEM)

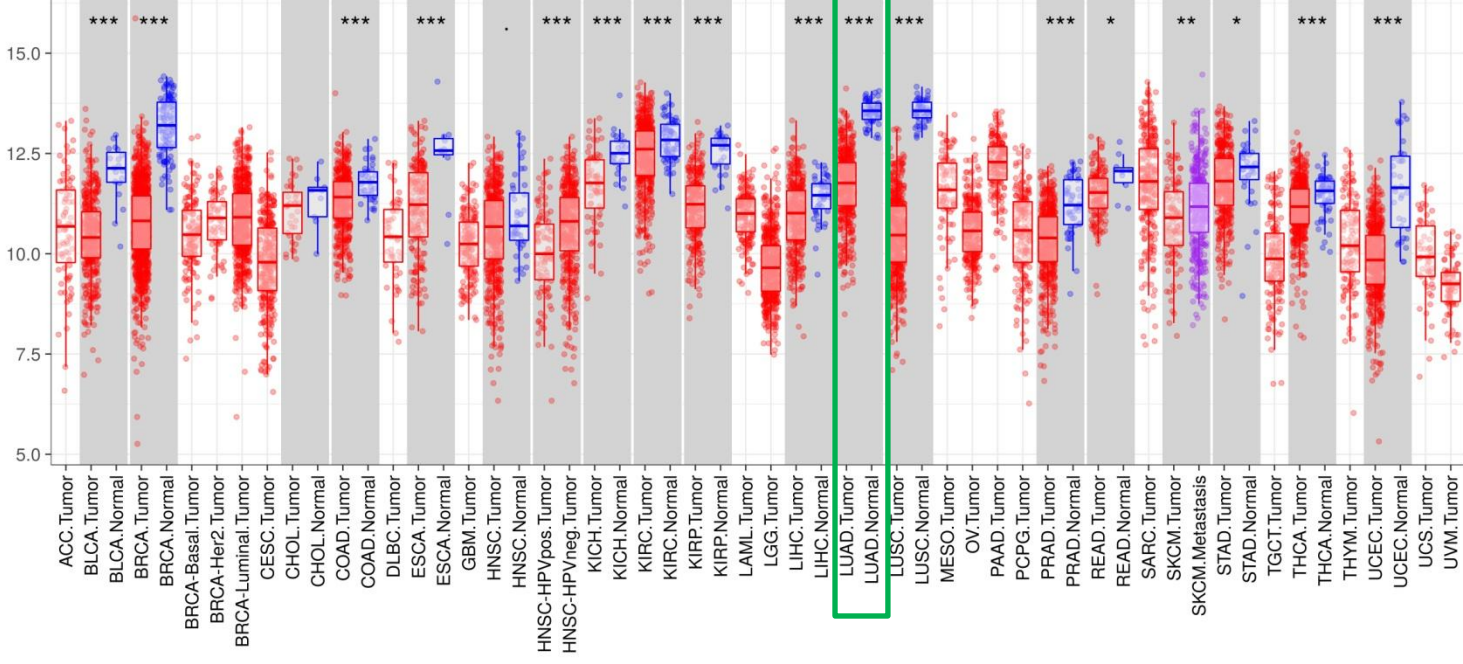

ITGAE Expression Level (log2 RSEM)

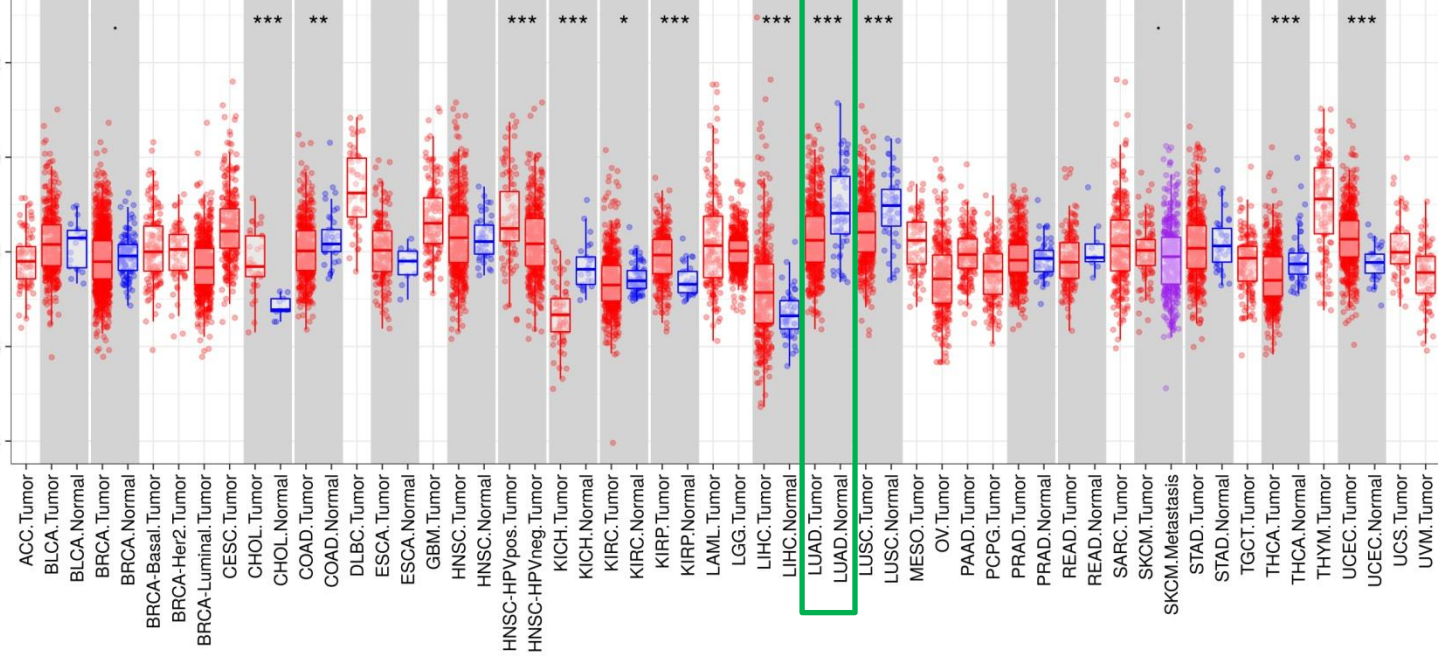



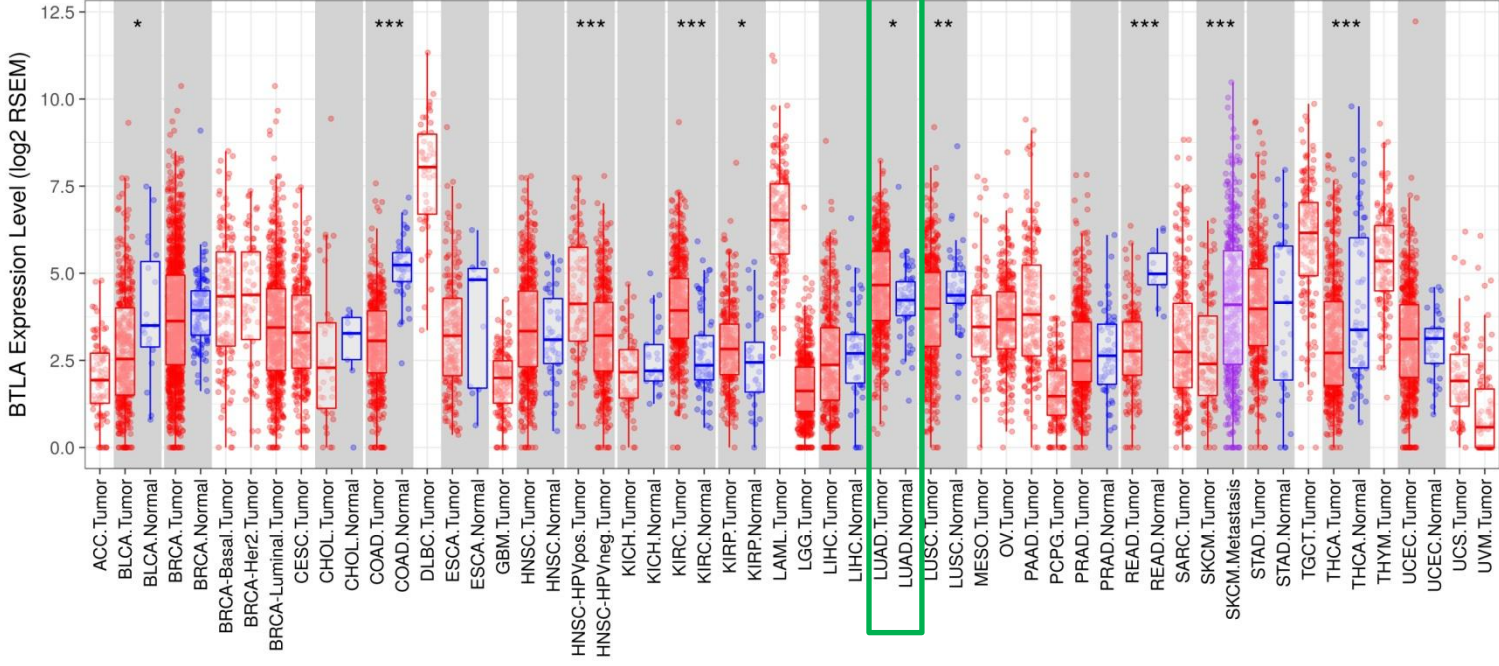

TLR4 Expression Level (log<sub>2</sub> RSEM)

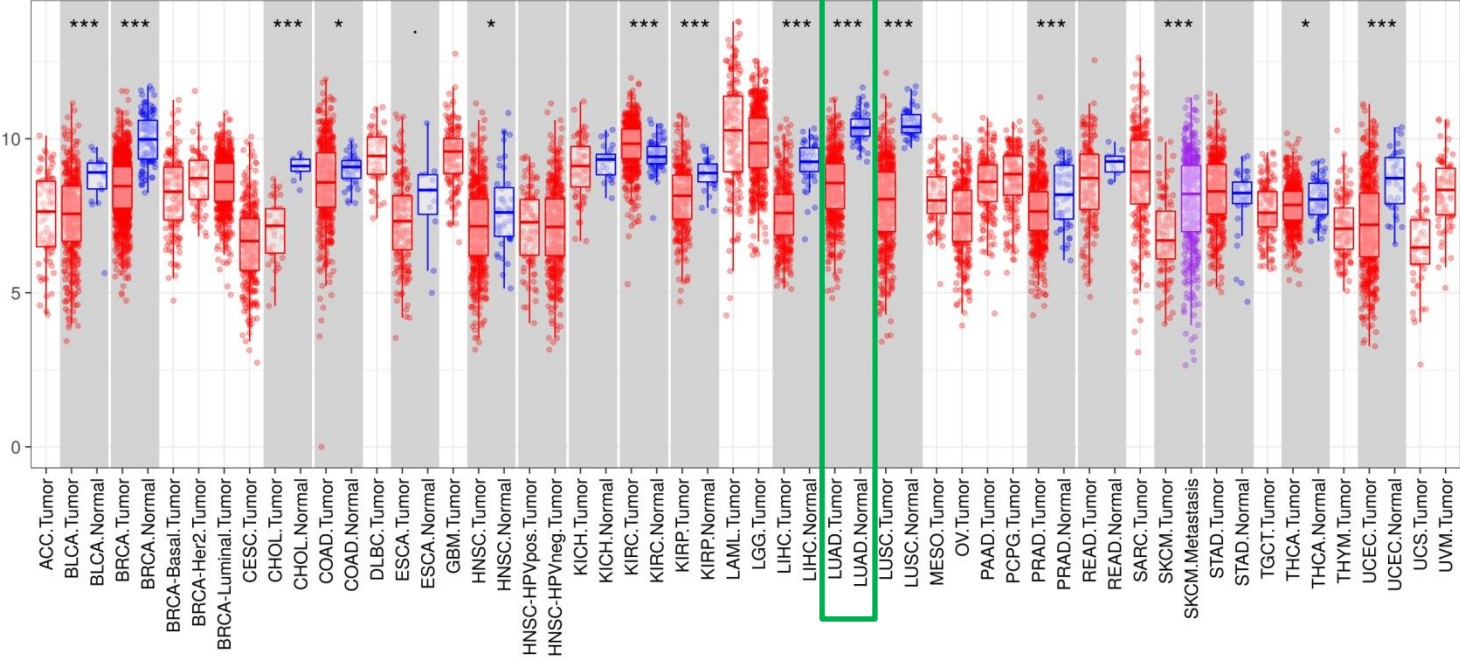

TBK1 Expression Level (log2 RSEM)

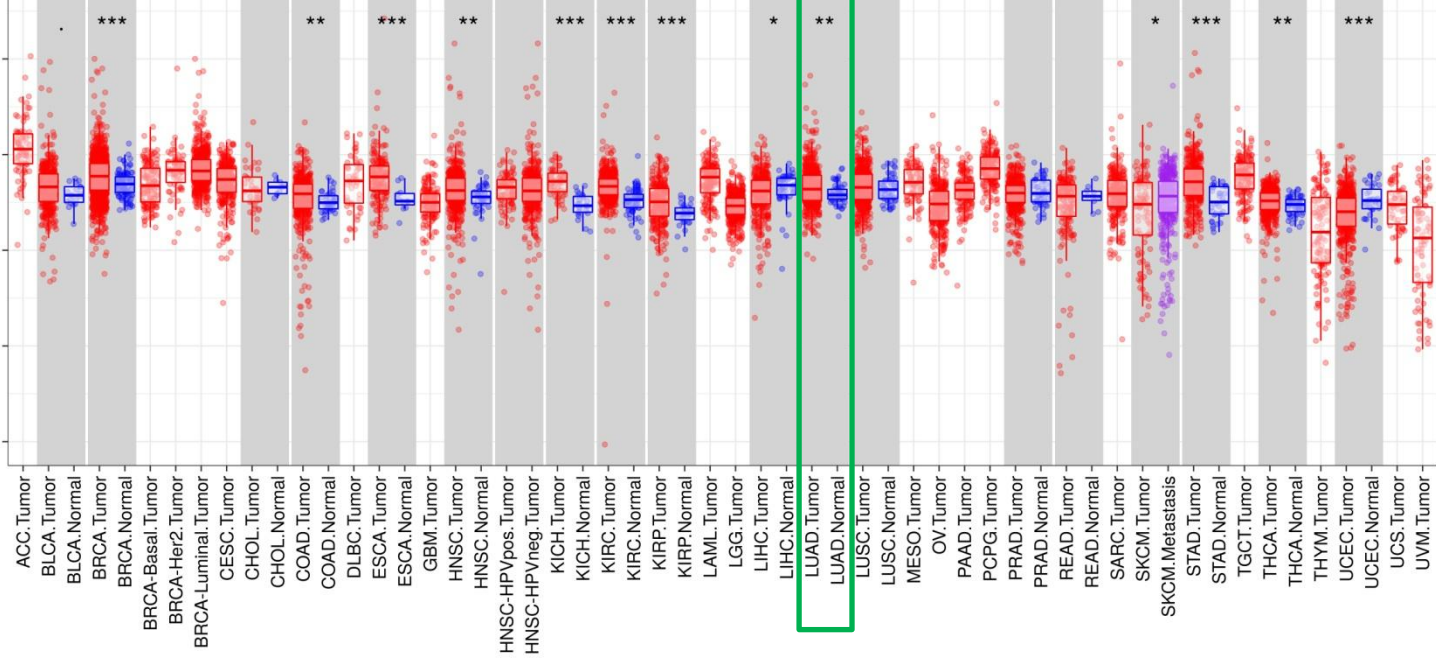

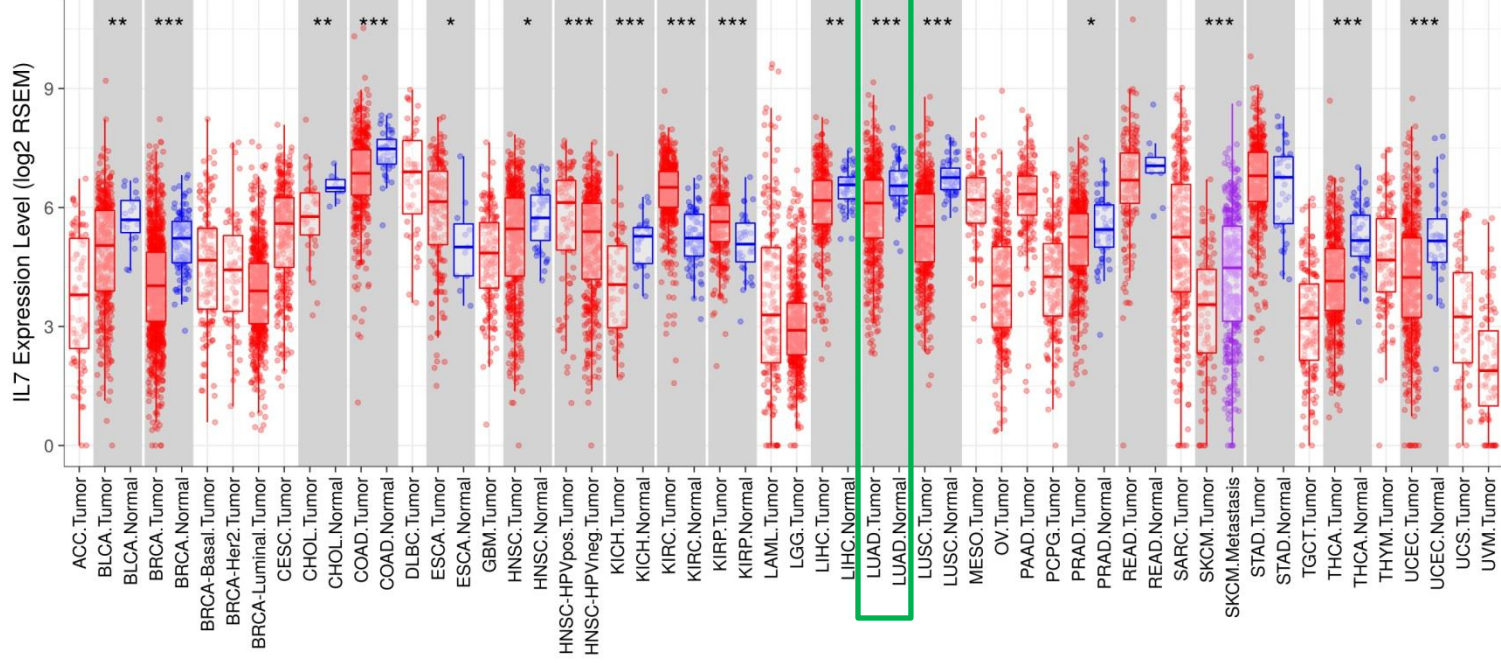



FAS Expression Level (log2 RSEM)

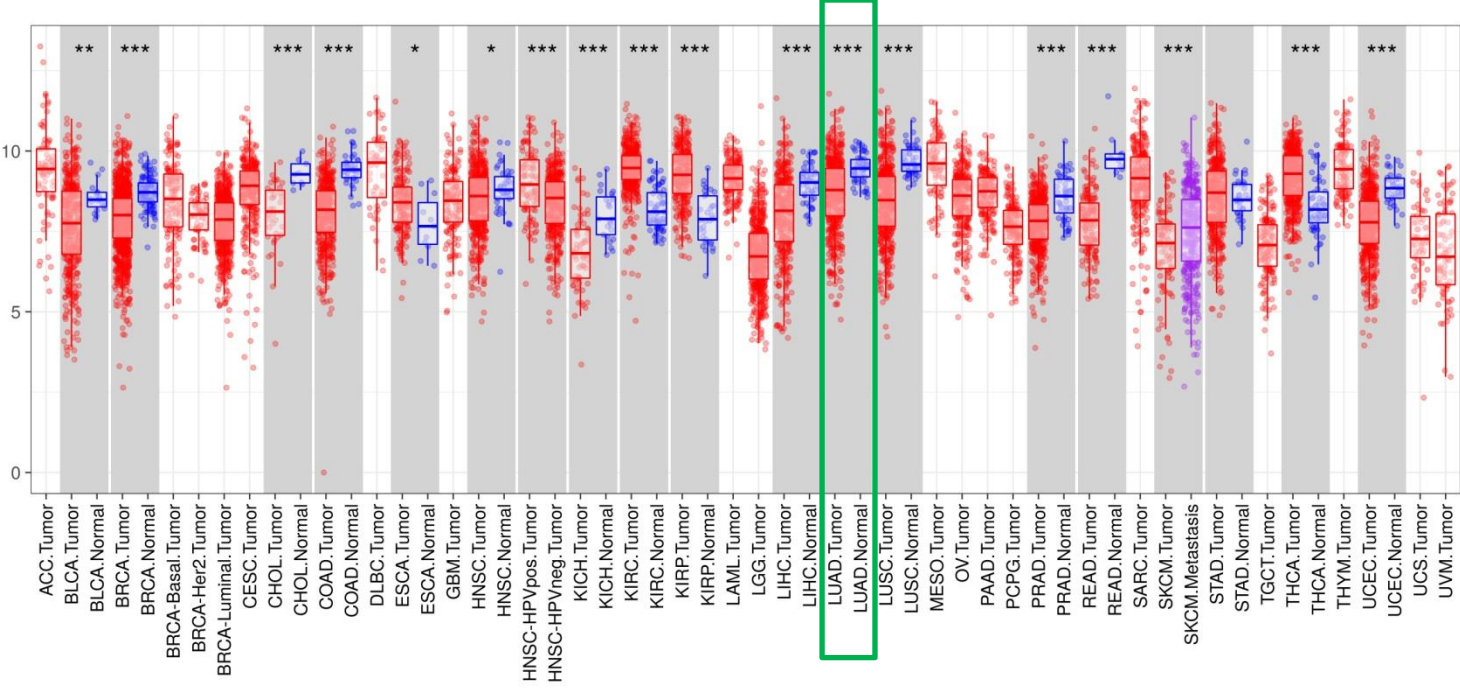

CXCL10 Expression Level (log2 RSEM)

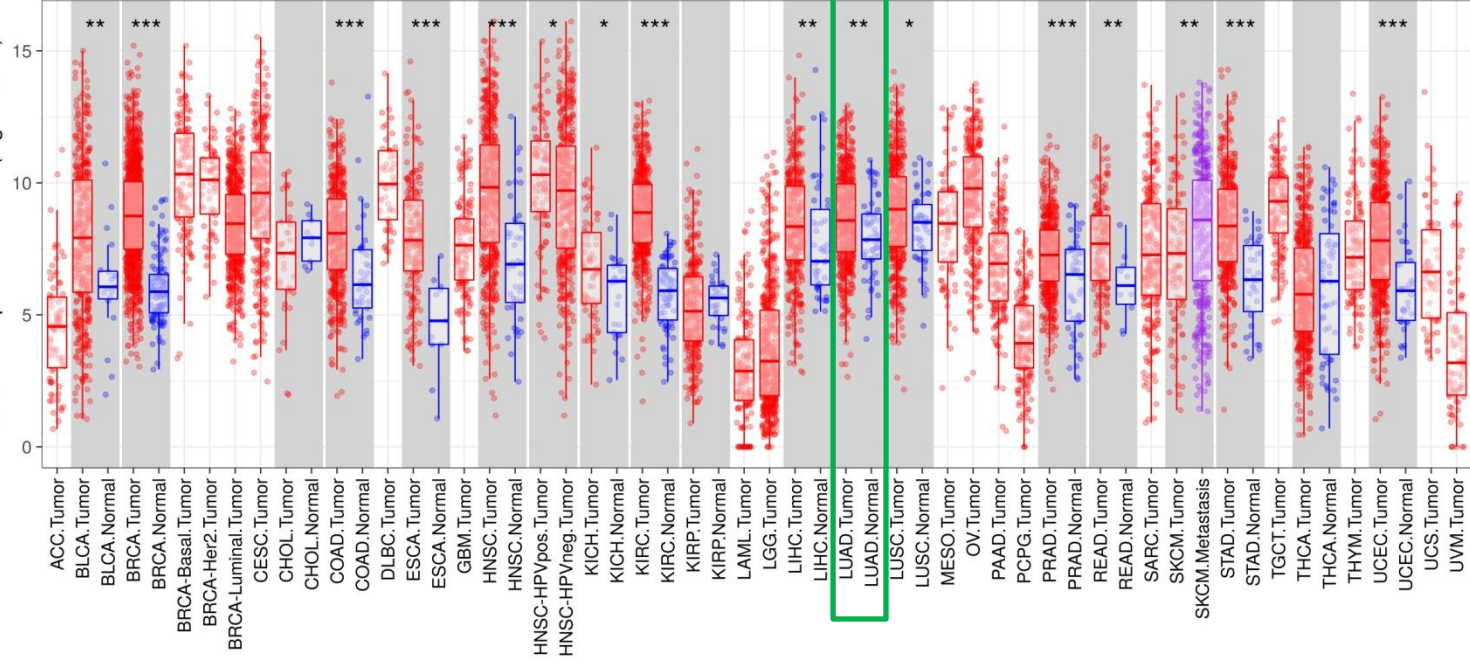

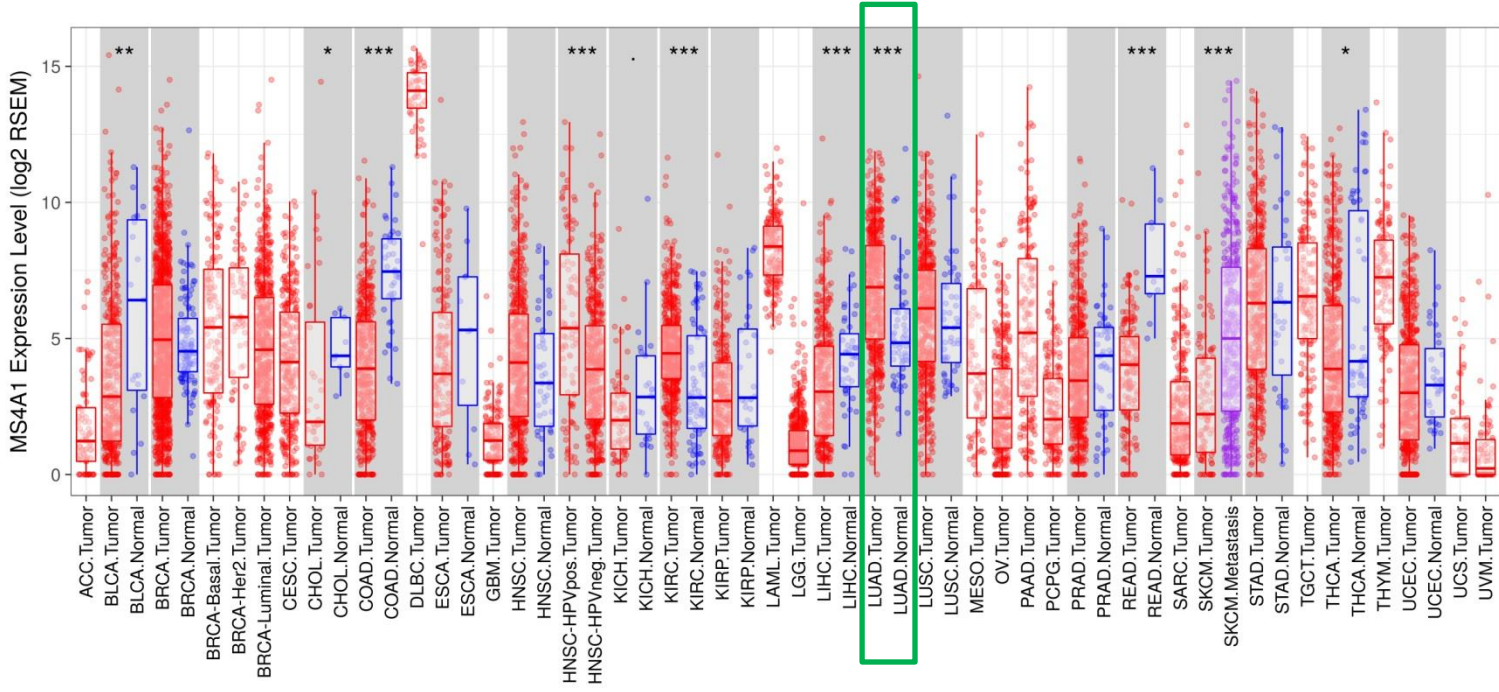

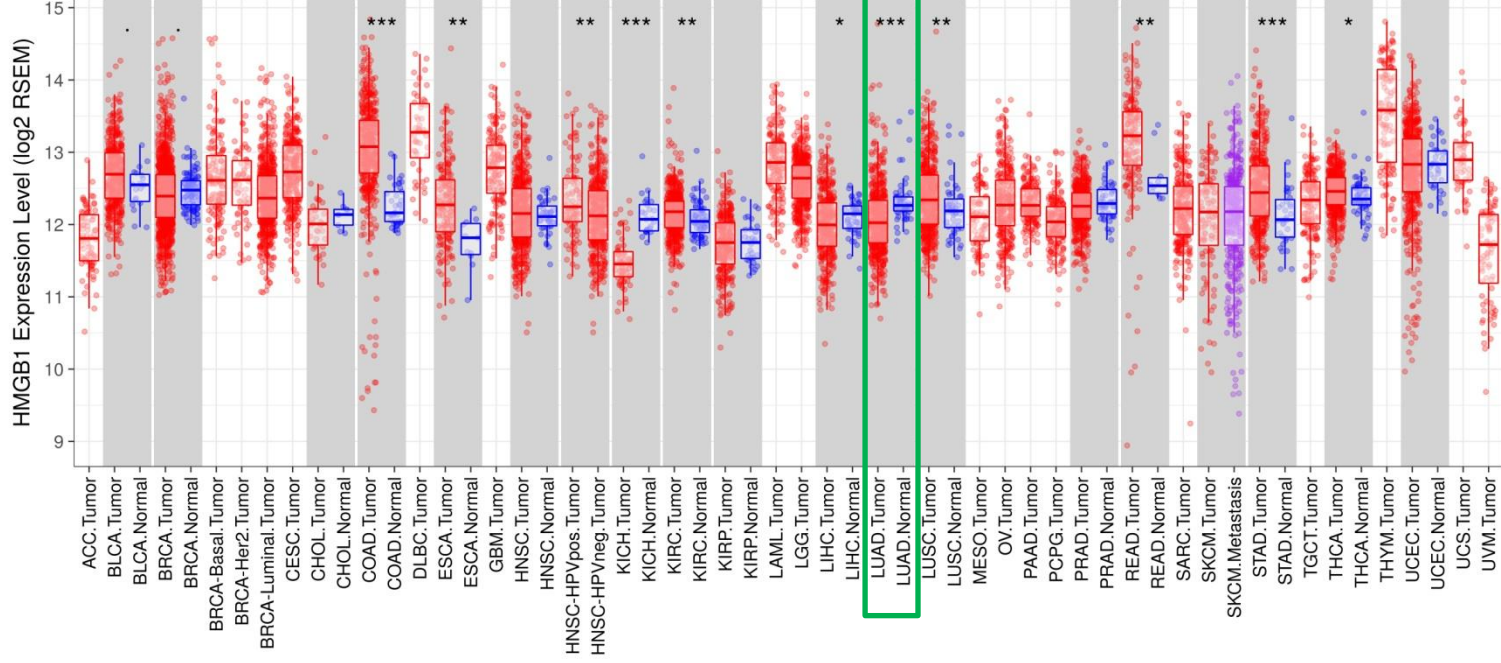



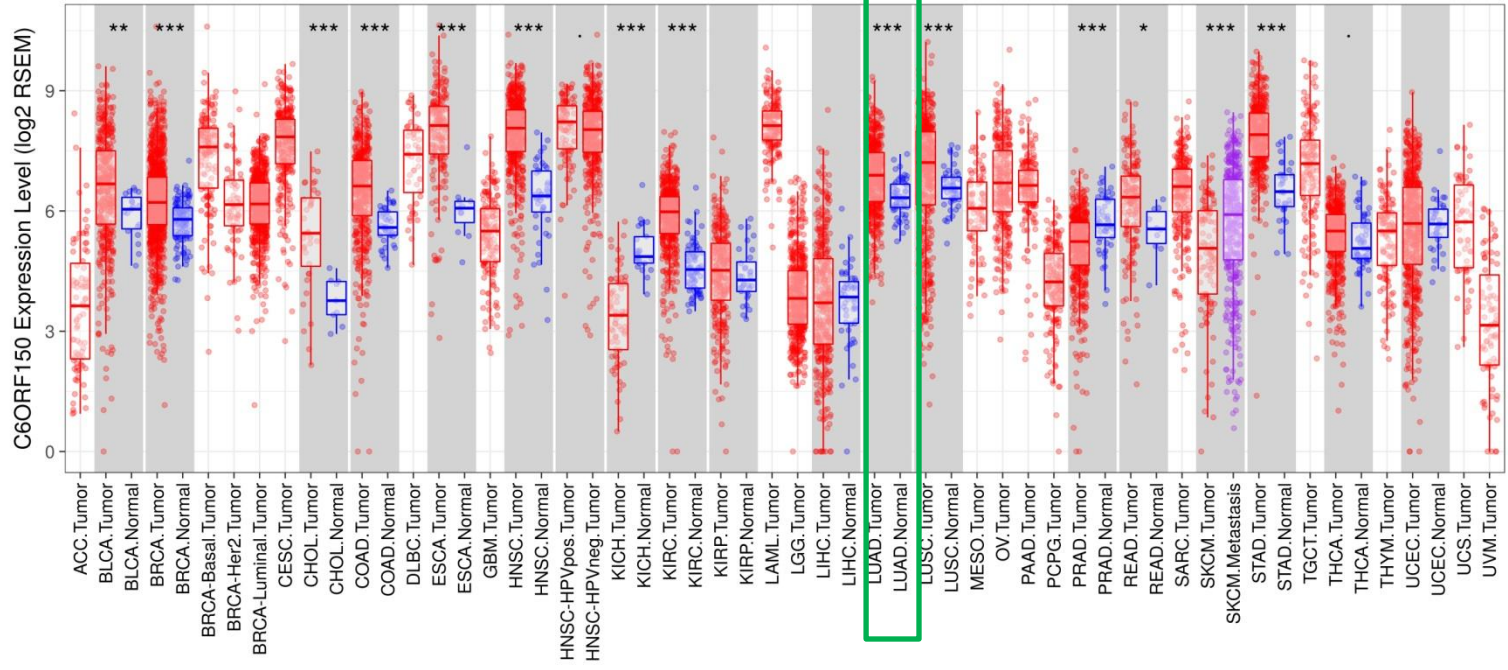

\*MB21D1

SERPINE1 Expression Level (log2 RSEM)

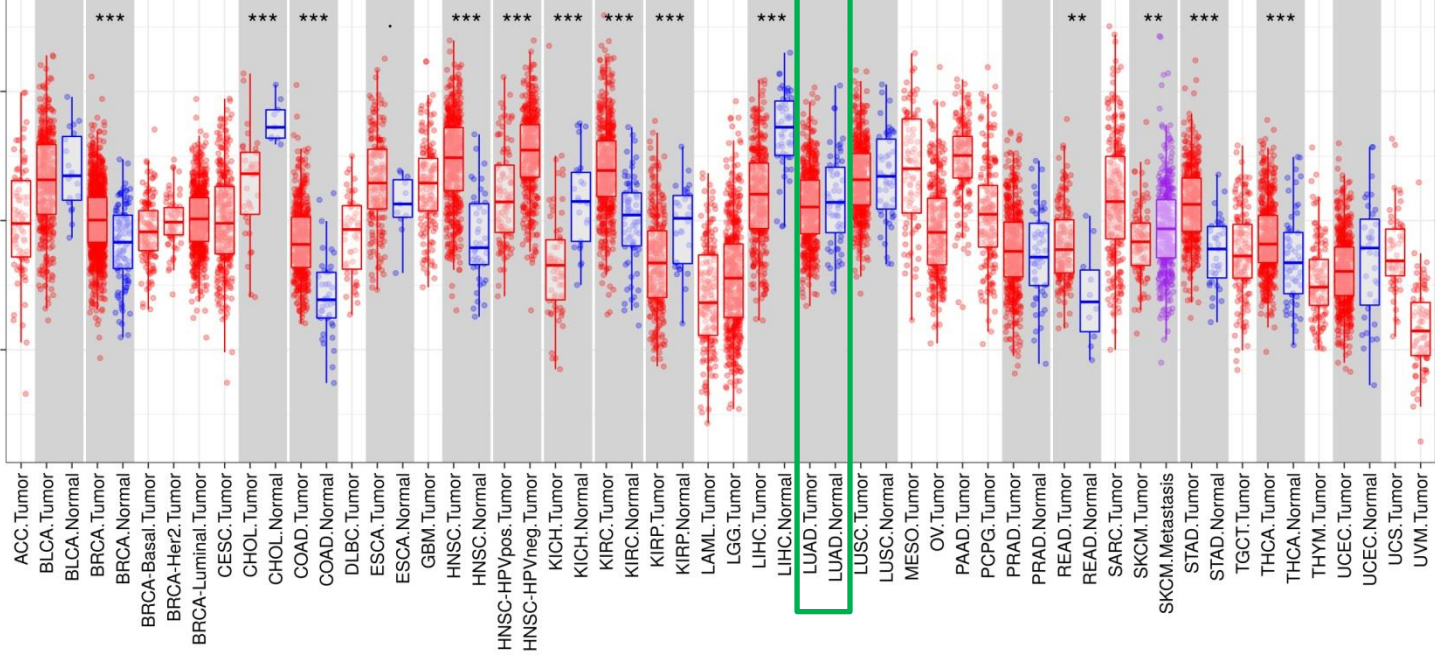

CCL13 Expression Level (log2 RSEM)

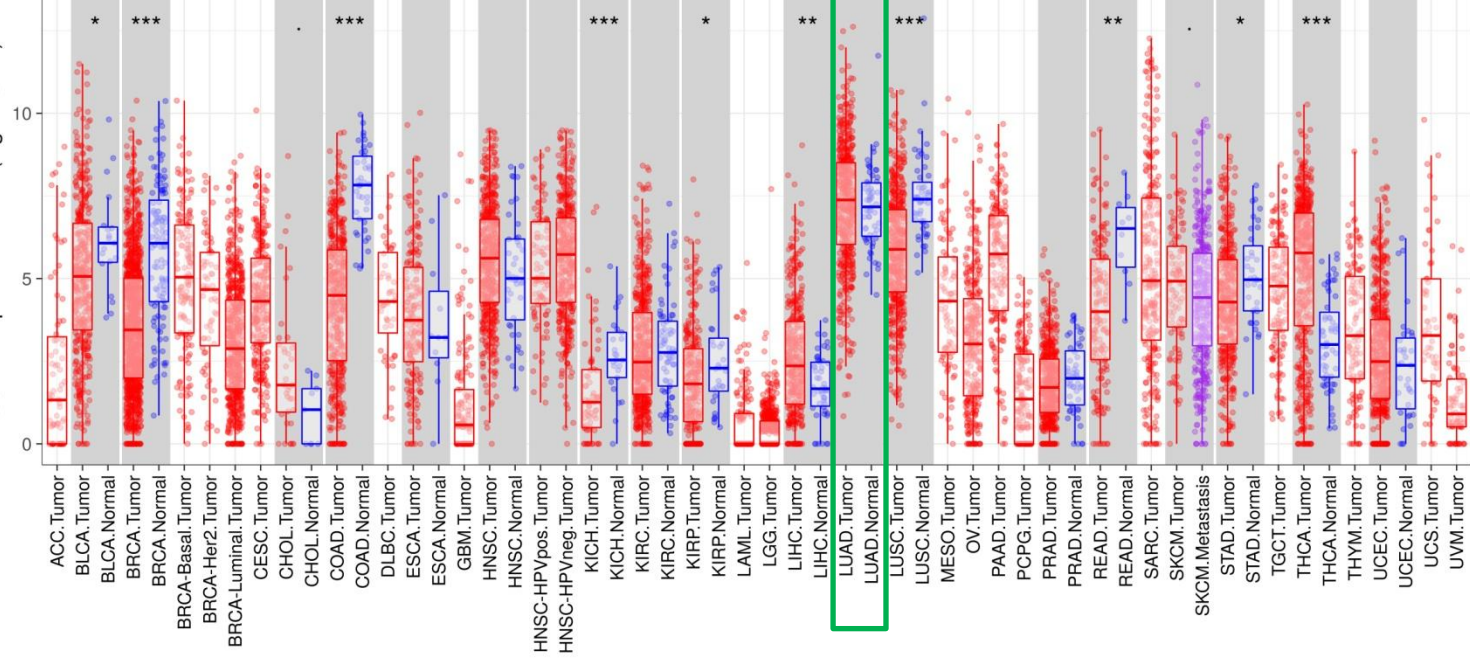

Supplement: cancers-11-01145-s001.pdf [file cancers-11-01145-s001.pdf]
